# Supplementary material for: Impaired Synthesis of Stromal Components in Response to Minnelide Improves Vascular Function, Drug Delivery, and Survival in Pancreatic Cancer
Source: Oxford University Press journal article supplement (doi:10.1158/1078-0432.ccr-15-1155), 2015-09-24
Supplement: 10780432ccr151155-sup-149846_1_supp_3106525_nt97hd.docx [file 10780432ccr151155-sup-149846_1_supp_3106525_nt97hd.docx]

Supplementary Table 1: Genes upregulated in KPC tumors vs mouse PDC

| UP | Down |
| --- | --- |
| Adamts5 | Adamts1 |
| Adamts8 | Adamts2 |
| Ctnna2 | Ctnna1 |
| Cdh1 | Cd44 |
| Cdh2 | Cdh3 |
| Col1a1 | Cntn1 |
| Col2a1 | Col4a3 |
| Col3a1 | Ecm1 |
| Col4a1 | Emilin1 |
| Col4a2 | Fbln1 |
| Col5a1 | Itga2 |
| Col6a1 | Itga5 |
| Vcan | Itgam |
| Ctgf | Itgax |
| Entpd1 | Lama2 |
| Hapln1 | Lama3 |
| Hc | Lamb2 |
| Icam1 | Lamb3 |
| Itga3 | Lamc1 |
| Itga4 | Mmp13 |
| Itgav | Mmp14 |
| Itgb1 | Mmp15 |
| Itgb2 | Mmp2 |
| Itgb3 | Spock1 |
| Itgb4 | Syt1 |
| Lama1 | Tgfbi |
| Mmp11 | Vcam1 |
| Mmp12 | Vtn |
| Mmp8 |  |
| Pecam1 |  |
| Postn |  |
| Sele |  |
| Sell |  |
| Selp |  |
| Sgce |  |
| Sparc |  |
| Thbs2 |  |
| Thbs3 |  |
| Timp1 |  |
| Timp2 |  |
| Timp3 |  |
| Tnc |  |
|  |  |  |  |
