# Supplementary material for: Impaired Synthesis of Stromal Components in Response to Minnelide Improves Vascular Function, Drug Delivery, and Survival in Pancreatic Cancer
Source: Oxford University Press journal article supplement (doi:10.1158/1078-0432.ccr-15-1155), 2015-09-24
Supplement: 10780432ccr151155-sup-149846_1_supp_3106526_nt97h8.docx [file 10780432ccr151155-sup-149846_1_supp_3106526_nt97h8.docx]

| **Cell Line** | **IC50 (nM)** | **95%CI (nM)** |
| --- | --- | --- |
| K-CAF1 | 73.30 | 56.42, 95.23 |
| K-CAF5 | 197.5 | 126.5, 308.3 |
| KPC001 | 133.1 | 99.18, 178.5 |
| Panc02 | 127.6 | 52.56, 310.0 |

IC50 of mouse CAFs and PDACs after 48h treatment with triptolide *in vitro.*
